# Supplementary material for: TD-DFT study of the excited state intramolecular proton transfer (ESIPT) mechanism and photophysical properties in coumarin–benzothiazole derivatives: substitution and solvent effects
Source: Royal Society of Chemistry journal article supplement (doi:10.1039/d2me00263a), 2023-01-01
Supplement: d2me00263a1.pdf [file d2me00263a1.pdf]

**Supplementary Data**

**TD-DFT study of the excited state intramolecular proton transfer (ESIPT) mechanism in the  
coumarin-benzothiazole derivatives: Substitution and solvent effects**

Hossein Roohi\*, Tahereh Pouryahya

*Department of Chemistry, Faculty of Science, University of Guilan, P.O. Box 98135-674, Rasht, Iran*

---

\* Corresponding author. Tel: +981313243630-35; Fax: +981313220066  
E-mail: [hroohi@guilan.ac.ir](mailto:hroohi@guilan.ac.ir)

Table S1. The selected topological parameters (au) of studied molecules in the gas phase.

|              | $S_0(E)$  |                   |         | $S_1(K)$  |                   |         |
|--------------|-----------|-------------------|---------|-----------|-------------------|---------|
|              | $\rho(r)$ | $\nabla^2\rho(r)$ | $H(r)$  | $\rho(r)$ | $\nabla^2\rho(r)$ | $H(r)$  |
| <b>C1</b>    |           |                   |         |           |                   |         |
| O–H          | 0.3166    | -2.1682           | -0.6131 | 0.0423    | 0.1309            | -0.0022 |
| N $\cdots$ H | 0.0642    | 0.1175            | -0.0184 | 0.3157    | -1.8237           | -0.5000 |
| d1           | 0.3585    | -0.9709           | -0.5395 | 0.3182    | -0.8664           | -0.4465 |
| d2           | 0.2744    | -0.7031           | -0.2508 | 0.2746    | -0.6875           | -0.2602 |
| d3           | 0.2949    | -0.7873           | -0.2886 | 0.2743    | -0.6957           | -0.2500 |
| d4           | 0.3173    | -0.3348           | -0.4779 | 0.3747    | -0.2788           | -0.6082 |
| d5           | 0.4263    | -0.1025           | -0.7345 | 0.4248    | -0.1211           | -0.7309 |
| S–O          | 0.0197    | 0.0704            | 0.0012  | 0.0176    | 0.0622            | 0.0012  |
| R–C          | 0.2817    | -0.9826           | -0.2806 | 0.2816    | -0.9821           | -0.2810 |
| Ring A       | 0.0200    | 0.1271            | 0.0055  | 0.0166    | 0.1045            | 0.0047  |
| <b>C2</b>    |           |                   |         |           |                   |         |
| O–H          | 0.3163    | -2.1633           | -0.6122 | 0.0452    | 0.1360            | -0.0034 |
| N $\cdots$ H | 0.0647    | 0.1175            | -0.0187 | 0.3132    | -1.8026           | -0.4953 |
| d1           | 0.3580    | -0.9711           | -0.5382 | 0.3174    | -0.8680           | -0.4434 |
| d2           | 0.2741    | -0.7014           | -0.2502 | 0.2755    | -0.6924           | -0.2620 |
| d3           | 0.2965    | -0.7955           | -0.2917 | 0.2751    | -0.6989           | -0.2514 |
| d4           | 0.3169    | -0.3388           | -0.4768 | 0.3732    | -0.2883           | -0.6064 |
| d5           | 0.4239    | -0.1464           | -0.7290 | 0.4206    | -0.1847           | -0.7209 |
| S–O          | 0.0209    | 0.0748            | 0.0013  | 0.0183    | 0.0650            | 0.0012  |
| R–C          | 0.3171    | -0.8295           | -0.4552 | 0.3186    | -0.8157           | -0.4605 |
| Ring A       | 0.0200    | 0.1276            | 0.0055  | 0.0170    | 0.1078            | 0.0049  |
| <b>C3</b>    |           |                   |         |           |                   |         |
| O–H          | 0.3152    | -2.1529           | -0.6095 | 0.0431    | 0.1328            | -0.0025 |
| N $\cdots$ H | 0.0651    | 0.1170            | -0.0190 | 0.3152    | -1.8200           | -0.4992 |
| d1           | 0.3583    | -0.9696           | -0.5391 | 0.3175    | -0.8671           | -0.4440 |
| d2           | 0.2739    | -0.7010           | -0.2497 | 0.2753    | -0.6918           | -0.2612 |
| d3           | 0.2961    | -0.7937           | -0.2909 | 0.2745    | -0.6958           | -0.2503 |
| d4           | 0.3181    | -0.3394           | -0.4794 | 0.3747    | -0.2833           | -0.6083 |
| d5           | 0.4265    | -0.1192           | -0.7352 | 0.4237    | -0.1521           | -0.7284 |
| S–O          | 0.0204    | 0.0728            | 0.0013  | 0.0180    | 0.0638            | 0.0012  |
| R–C          | 0.2989    | -0.2690           | -0.4382 | 0.3001    | -0.2399           | -0.4407 |
| Ring A       | 0.0201    | 0.1279            | 0.0055  | 0.0167    | 0.1056            | 0.0048  |
| <b>C4</b>    |           |                   |         |           |                   |         |
| O–H          | 0.3147    | -2.1455           | -0.6080 | 0.0458    | 0.1374            | -0.0037 |
| N $\cdots$ H | 0.0660    | 0.1170            | -0.0196 | 0.3133    | -1.8050           | -0.4961 |
| d1           | 0.3578    | -0.9698           | -0.5379 | 0.3173    | -0.8676           | -0.4432 |
| d2           | 0.2732    | -0.6968           | -0.2486 | 0.2752    | -0.6911           | -0.2610 |

Table S1. Continued

|           |        |         |         |        |         |         |
|-----------|--------|---------|---------|--------|---------|---------|
| d3        | 0.2976 | -0.8027 | -0.2938 | 0.2756 | -0.7021 | -0.2522 |
| d4        | 0.3181 | -0.3349 | -0.4795 | 0.3743 | -0.2775 | -0.6073 |
| d5        | 0.4250 | -0.1358 | -0.7315 | 0.4216 | -0.1753 | -0.7231 |
| S-O       | 0.0218 | 0.0783  | 0.0013  | 0.0193 | 0.0688  | 0.0012  |
| R-C       | 0.2931 | -0.2386 | -0.4250 | 0.2960 | -0.2026 | -0.4309 |
| Ring A    | 0.0201 | 0.1287  | 0.0055  | 0.0171 | 0.1088  | 0.0049  |
| <b>C5</b> |        |         |         |        |         |         |
| O-H       | 0.3169 | -2.1706 | -0.6138 | 0.0428 | 0.1314  | -0.0024 |
| N...H     | 0.0643 | 0.1178  | -0.0184 | 0.3151 | -1.8189 | -0.4989 |
| d1        | 0.3583 | -0.9711 | -0.5390 | 0.3179 | -0.8674 | -0.4452 |
| d2        | 0.2740 | -0.7011 | -0.2502 | 0.2736 | -0.6823 | -0.2585 |
| d3        | 0.2956 | -0.7913 | -0.2900 | 0.2757 | -0.7031 | -0.2526 |
| d4        | 0.3169 | -0.3359 | -0.4768 | 0.3737 | -0.2857 | -0.6059 |
| d5        | 0.4254 | -0.1128 | -0.7323 | 0.4241 | -0.1290 | -0.7291 |
| S-O       | 0.0203 | 0.0727  | 0.0013  | 0.0179 | 0.0633  | 0.0012  |
| R-C       | 0.2567 | -0.6321 | -0.2205 | 0.2556 | -0.6269 | -0.2185 |
| Ring A    | 0.0200 | 0.1272  | 0.0055  | 0.0167 | 0.1051  | 0.0048  |

---

Table S1. Continued

|           | S <sub>0</sub> (E) |                    |         | S <sub>1</sub> (E) |                    |         | S <sub>1</sub> (K) |                    |         |
|-----------|--------------------|--------------------|---------|--------------------|--------------------|---------|--------------------|--------------------|---------|
|           | $\rho$ (r)         | $\nabla^2 \rho(r)$ | H (r)   | $\rho$ (r)         | $\nabla^2 \rho(r)$ | H (r)   | $\rho$ (r)         | $\nabla^2 \rho(r)$ | H (r)   |
| <b>C6</b> |                    |                    |         |                    |                    |         |                    |                    |         |
| O–H       | 0.3153             | -2.1547            | -0.6098 | 0.3350             | -2.3911            | -0.6662 | 0.0408             | 0.1290             | -0.0015 |
| N...H     | 0.0651             | 0.1169             | -0.0190 | 0.0515             | 0.1158             | -0.0100 | 0.3180             | -1.8464            | -0.5054 |
| d1        | 0.3587             | -0.9699            | -0.5400 | 0.3368             | -0.9747            | -0.4649 | 0.3178             | -0.8648            | -0.4453 |
| d2        | 0.2736             | -0.6988            | -0.2491 | 0.2998             | -0.8427            | -0.3000 | 0.2749             | -0.6895            | -0.2603 |
| d3        | 0.2958             | -0.7929            | -0.2902 | 0.2794             | -0.7020            | -0.2583 | 0.2748             | -0.6993            | -0.2510 |
| d4        | 0.3193             | -0.3310            | -0.4821 | 0.3116             | -0.3587            | -0.4652 | 0.3763             | -0.2698            | -0.6121 |
| d5        | 0.4274             | -0.0927            | -0.7374 | 0.4221             | -0.1319            | -0.7243 | 0.4258             | -0.1130            | -0.7335 |
| S–O       | 0.0200             | 0.0722             | 0.0013  | 0.0272             | 0.0990             | 0.0013  | 0.0185             | 0.0659             | 0.0013  |
| R–C       | 0.2664             | -0.6982            | -0.2327 | 0.2865             | -0.8189            | -0.2704 | 0.2656             | -0.6950            | -0.2320 |
| Ring A    | 0.0201             | 0.1280             | 0.0055  | 0.0183             | 0.1134             | 0.0050  | 0.0165             | 0.1031             | 0.0047  |
| <b>C7</b> |                    |                    |         |                    |                    |         |                    |                    |         |
| O–H       | 0.3145             | -2.1472            | -0.6080 | 0.3350             | -2.3914            | -0.6662 | 0.0414             | 0.1311             | -0.0017 |
| N...H     | 0.0655             | 0.1166             | -0.0193 | 0.0514             | 0.1158             | -0.0100 | 0.3178             | -1.8432            | -0.5047 |
| d1        | 0.3588             | -0.9693            | -0.5404 | 0.3369             | -0.9747            | -0.4654 | 0.3199             | -0.8652            | -0.4512 |
| d2        | 0.2738             | -0.7002            | -0.2494 | 0.2996             | -0.8418            | -0.2996 | 0.2792             | -0.7126            | -0.2686 |
| d3        | 0.2948             | -0.7876            | -0.2882 | 0.2802             | -0.7067            | -0.2600 | 0.2732             | -0.6898            | -0.2479 |
| d4        | 0.3198             | -0.3308            | -0.4834 | 0.3123             | -0.3539            | -0.4667 | 0.3775             | -0.259             | -0.6150 |
| d5        | 0.4276             | -0.0920            | -0.7379 | 0.4234             | -0.1202            | -0.7276 | 0.4249             | -0.1237            | -0.7313 |
| S–O       | 0.0195             | 0.0702             | 0.0013  | 0.0266             | 0.0965             | 0.0014  | 0.0188             | 0.0669             | 0.0012  |
| R–C       | 0.2800             | -0.7801            | -0.2751 | 0.3003             | -0.8990            | -0.3149 | 0.2837             | -0.8027            | -0.2834 |
| Ring A    | 0.0201             | 0.1282             | 0.0055  | 0.0183             | 0.1136             | 0.0051  | 0.0166             | 0.1048             | 0.0048  |
| <b>C8</b> |                    |                    |         |                    |                    |         |                    |                    |         |
| O–H       | 0.3135             | -2.1343            | -0.6052 | 0.3313             | -2.3500            | -0.6564 | 0.0581             | 0.1520             | -0.0101 |
| N...H     | 0.0667             | 0.1165             | -0.0201 | 0.0544             | 0.1171             | -0.0118 | 0.2986             | -1.6556            | -0.4610 |
| d1        | 0.3586             | -0.9688            | -0.5398 | 0.3374             | -0.9748            | -0.4673 | 0.3355             | -0.8624            | -0.4947 |
| d2        | 0.2728             | -0.6946            | -0.2477 | 0.2985             | -0.8348            | -0.2947 | 0.2866             | -0.7518            | -0.2826 |
| d3        | 0.2965             | -0.7977            | -0.2915 | 0.2812             | -0.7113            | -0.2116 | 0.2716             | -0.6768            | -0.2446 |
| d4        | 0.3205             | -0.3269            | -0.4849 | 0.3167             | -0.3233            | -0.4765 | 0.3753             | -0.2489            | -0.6095 |
| d5        | 0.4278             | -0.0921            | -0.7385 | 0.4263             | -0.1001            | -0.7349 | 0.4271             | -0.0971            | -0.7366 |
| S–O       | 0.0206             | 0.0744             | 0.0013  | 0.0261             | 0.0958             | 0.0014  | 0.0220             | 0.0797             | 0.0014  |
| R–C       | 0.2507             | -0.6474            | -0.2688 | 0.2987             | -0.7699            | -0.4232 | 0.2890             | -0.7580            | -0.3978 |
| Ring A    | 0.0202             | 0.1294             | 0.0056  | 0.0187             | 0.1172             | 0.0052  | 0.0189             | 0.1242             | 0.0055  |
